# Supplementary material for: Consumers’ perceptions of vape shops in Southern California: an analysis of online Yelp reviews
Source: Springer Nature journal article supplement (doi:10.1186/s12971-014-0022-7), 2014-11-28
Supplement: MOESM1 [file 9768212]

**Appendix 1: Yelp Vape Shop Review Measure**

(Store#\_\_\_\_\_)

Date Collector: \_\_\_\_\_ Date: \_\_\_\_\_

Web site: \_\_\_\_\_ Reviewer Gender: #\_\_M #\_\_F  
#\_\_IDK

Total number of reviews on site: \_\_\_\_\_ in English (#\_\_5 star, #\_\_4 star, #\_\_3 star, #\_\_2 star, #\_\_1 star)

Number of reviews completed (most recent 5-to-20) \_\_\_\_\_ Dates of reviews: \_\_\_/\_\_\_/\_\_\_ - \_\_\_/\_\_\_/\_\_\_

Vape shop name: \_\_\_\_\_ Phone: (\_\_\_\_\_) \_\_\_\_\_

Address/City/State/Zip: \_\_\_\_\_

Location: \_\_\_\_\_

---

**1. Characteristics noted as important in this vape shop:**

Never rushed #\_\_\_\_\_ Fair prices #\_\_\_\_\_

Rebuilds/rebuilt/fix # \_\_\_\_\_

Wide range of nicotine #\_\_\_\_\_ On-line store capability #\_\_\_\_\_

Great selection of flavors (juices) or hardware #\_\_\_\_\_

Unique flavors or hardware #\_\_\_\_\_

Examples of unique flavors: \_\_\_\_\_

Examples of unique hardware: \_\_\_\_\_

Other #\_\_\_\_\_

Describe: \_\_\_\_\_

**2. Staff attributes mentioned (e.g., friendly, helpful):**

Helpful/patient/respectful #\_\_\_\_\_

Knowledgeable/professional #\_\_\_\_\_

Friendly #\_\_\_\_\_

Good personality (e.g., cool, relaxed) #\_\_\_\_\_

Quick service #\_\_\_\_\_

Let me try out lots of flavors #\_\_\_\_\_

Other #\_\_\_\_\_

Describe: \_\_\_\_\_

**3. Lifestyle environment suggested (e.g., alternative, relaxed, pleasurable, freaky, ethnic):**

Venue Type

Bar type: Yes#\_\_\_\_\_ No#\_\_\_\_\_ (e.g., wooden bar for tasting)

Club: Yes#\_\_\_\_\_ No#\_\_\_\_\_ (e.g., TV's & lighting)

Other: Yes#\_\_\_\_\_ Describe: \_\_\_\_\_

Venue Amenities

Parking: Good #\_\_\_\_\_ Bad #\_\_\_\_\_

Clean: Yes #\_\_\_\_\_ No #\_\_\_\_\_

Furniture: Yes #\_\_\_\_\_ Describe: \_\_\_\_\_ (e.g., modern couches)

Lighting: Yes #\_\_\_\_ Describe:\_\_\_\_\_ (e.g., bright LCD lights)

Art: Yes #\_\_\_\_ Describe:\_\_\_\_\_ (e.g., gnarly paintings)

Music: Yes #\_\_\_\_ Describe:\_\_\_\_\_ (e.g., great music)

TVs: Yes #\_\_\_\_ Describe:\_\_\_\_\_

Water tank: Yes #\_\_\_\_ Describe:\_\_\_\_\_

Mugs: Yes #\_\_\_\_ Describe:\_\_\_\_\_ (e.g., for coffee/hot cocoa)

Chalkboard menu:#\_\_\_\_ Describe:\_\_\_\_\_

Other Yes #\_\_\_\_ Describe:\_\_\_\_\_

Atmosphere

Chic/classy atmosphere: Yes #\_\_\_\_ Describe:\_\_\_\_\_

Relaxed atmosphere: Yes #\_\_\_\_ Describe:\_\_\_\_\_

Fun atmosphere: Yes #\_\_\_\_ Describe:\_\_\_\_\_

Awesome atmosphere: Yes #\_\_\_\_ Describe:\_\_\_\_\_

Other: Yes #\_\_\_\_ Describe:\_\_\_\_\_ (e.g., freaky)

**4. Health claims:**

E-cigarettes are vapor and safe #\_\_\_\_ Describe:\_\_\_\_\_

Can quit smoking here #\_\_\_\_ Describe:\_\_\_\_\_

Other #\_\_\_\_ Describe:\_\_\_\_\_

**5. Any negative comments:**

Limited number of flavors #\_\_\_\_

Other #\_\_\_\_ Describe:\_\_\_\_\_

**6. Ethnic or gender-specific comments:**

Hardware for girls/guys #\_\_\_\_ Describe:\_\_\_\_\_

Other #\_\_\_\_ Describe:\_\_\_\_\_

**7. Other comments:**

Please list any notes or other comments:

---



---
